# Supplementary material for: Avian Influenza A Viruses Reassort and Diversify Differently in Mallards and Mammals
Source: PubMed Central journal article supplement (PMC8003500; doi:10.3390/v13030509), 2021-03-19

# Supp Fig 1

## A

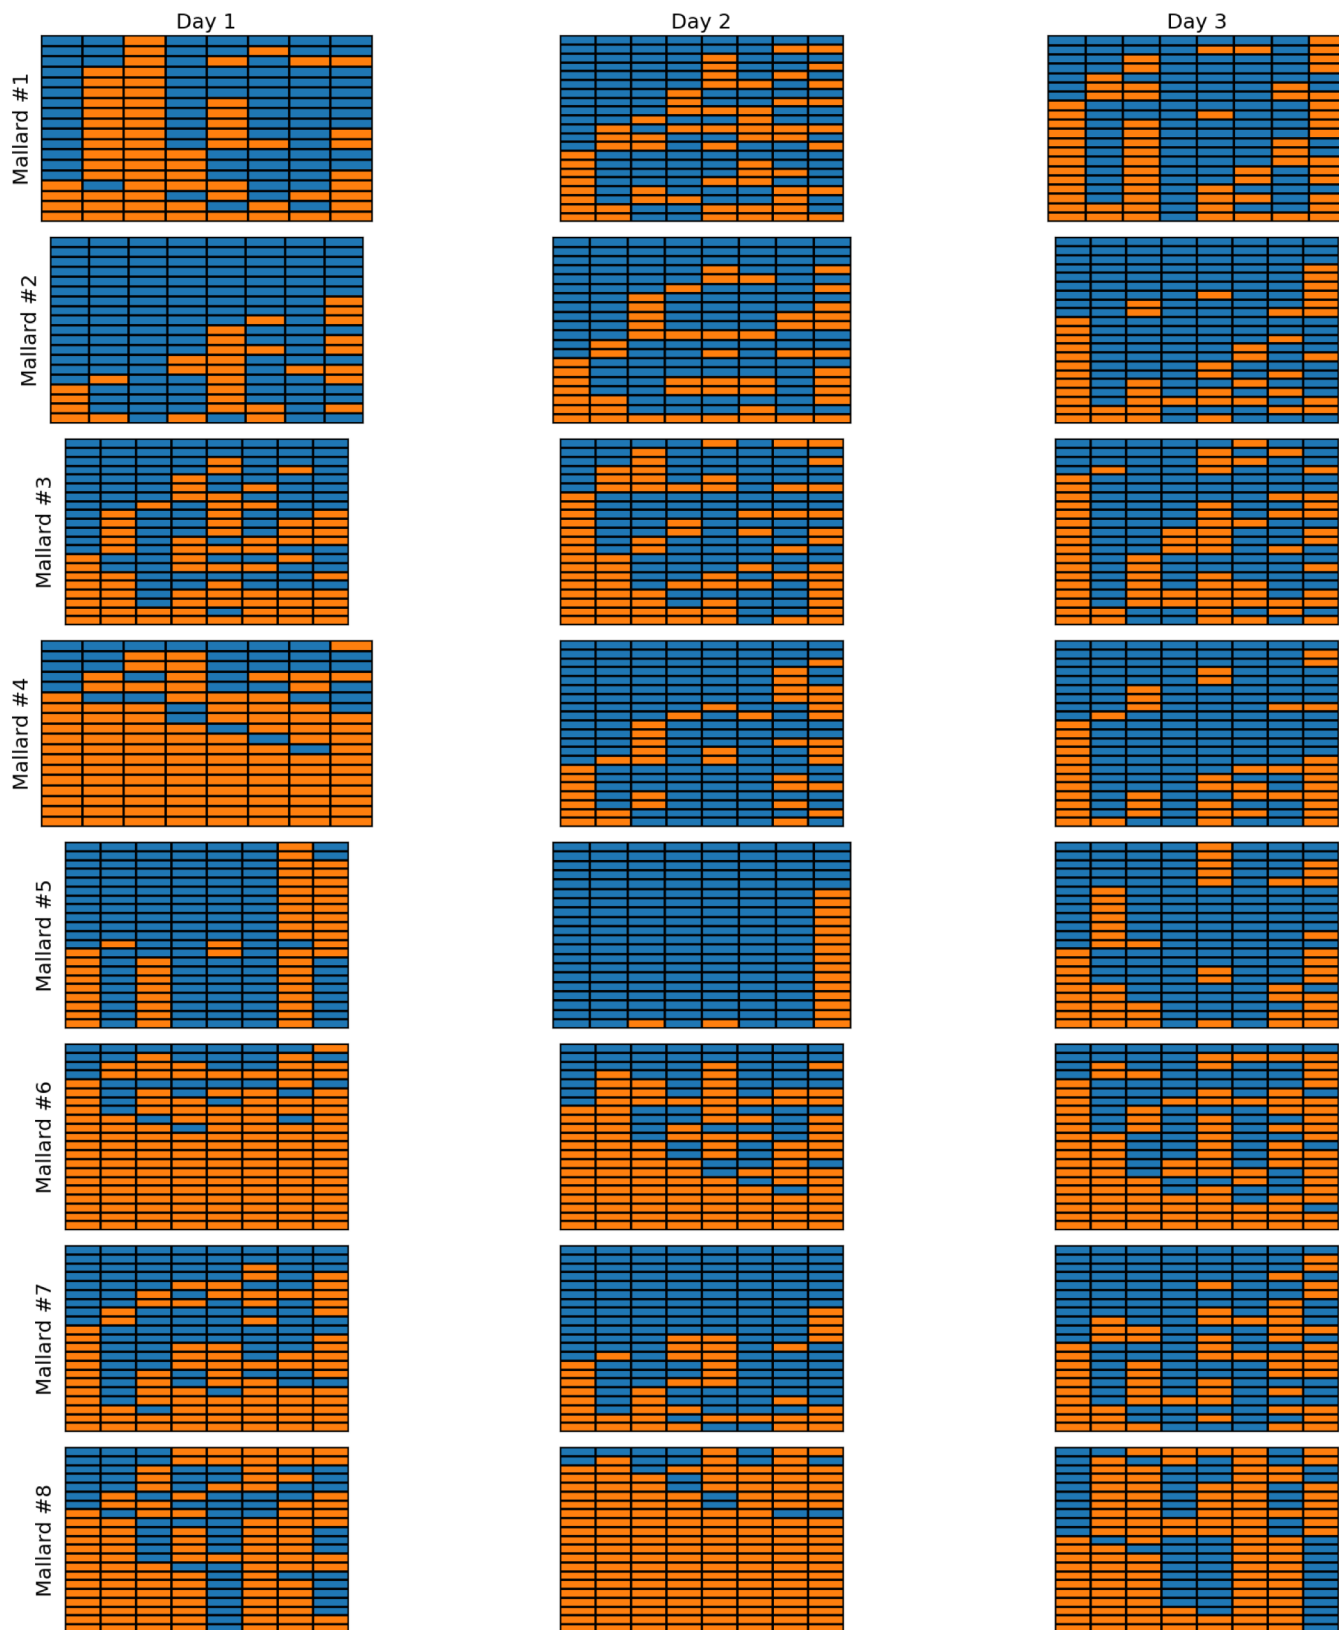

# Supp Fig 1

## B

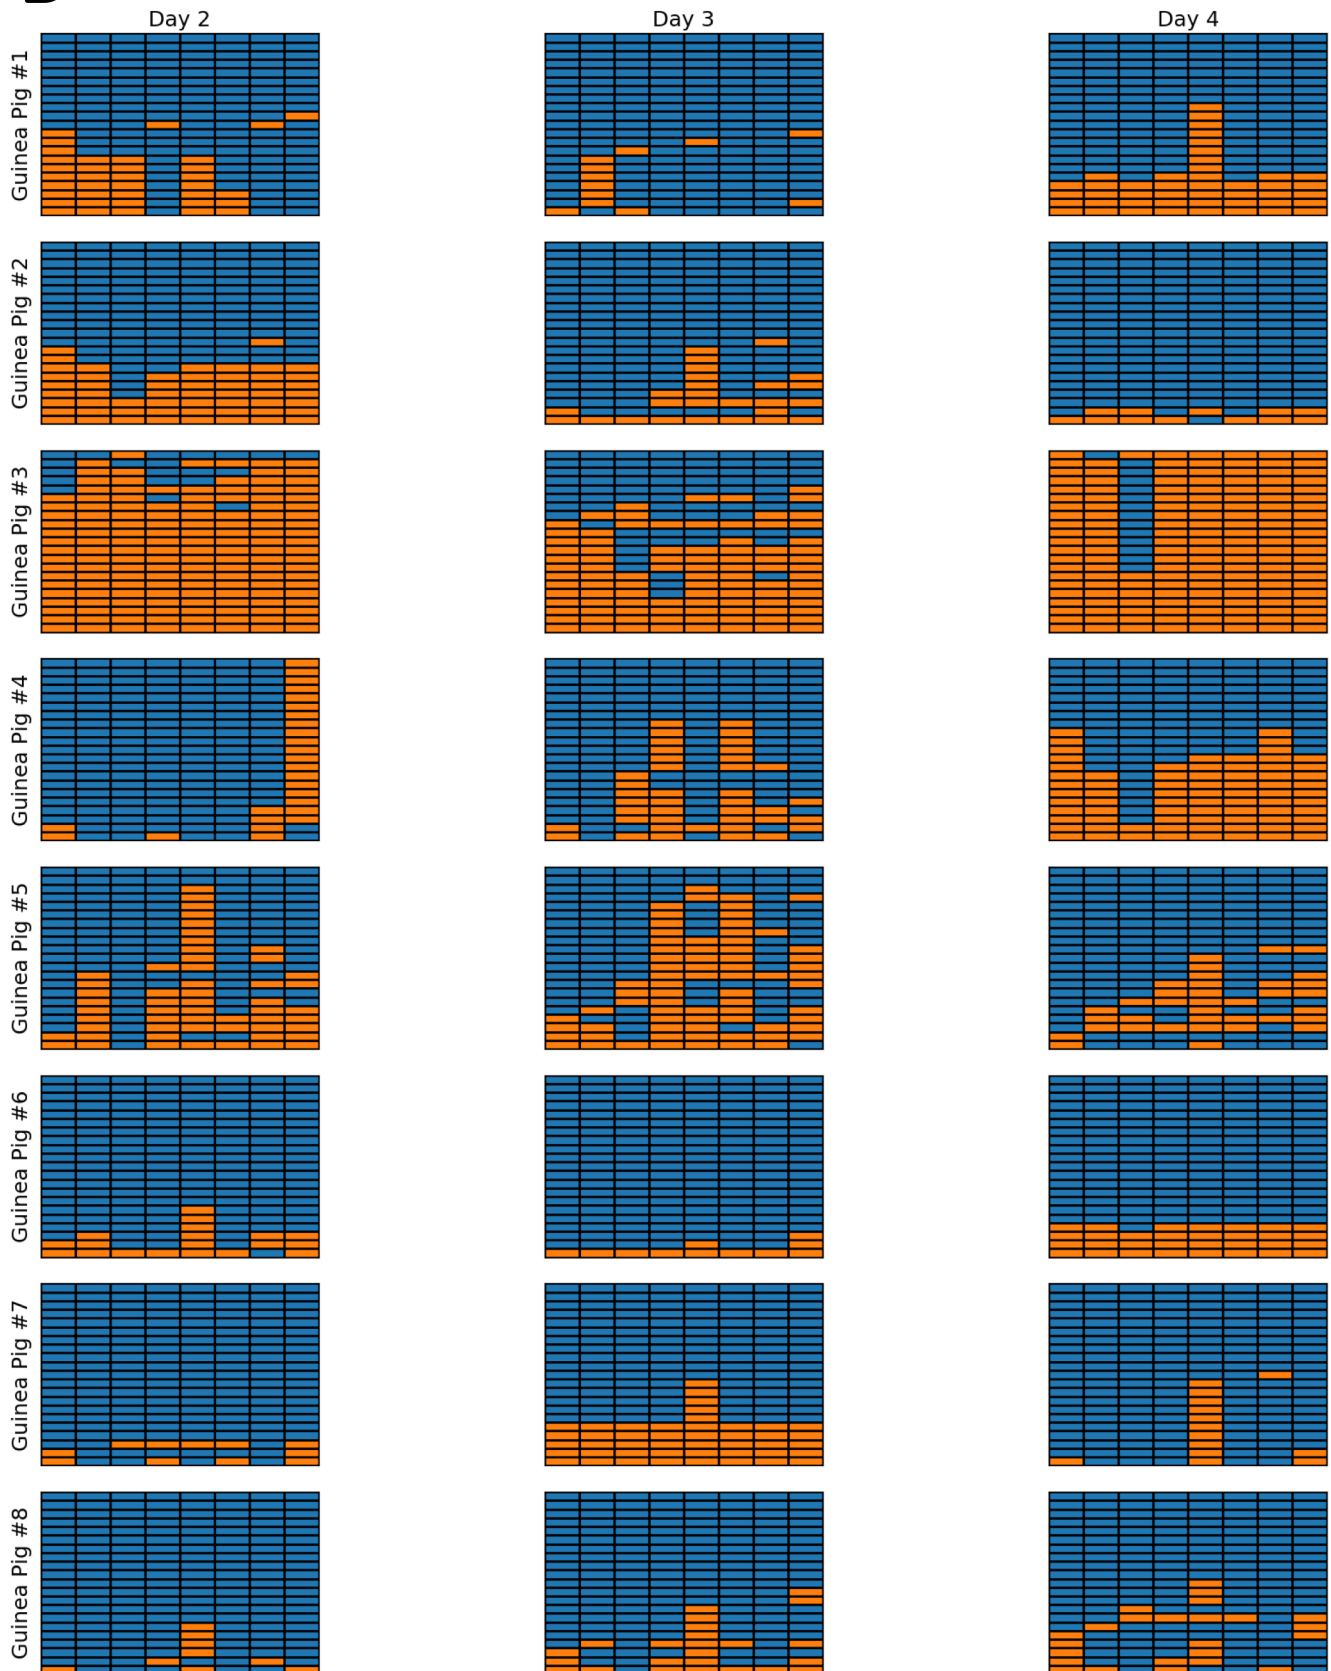

# Supp Fig 2

## A

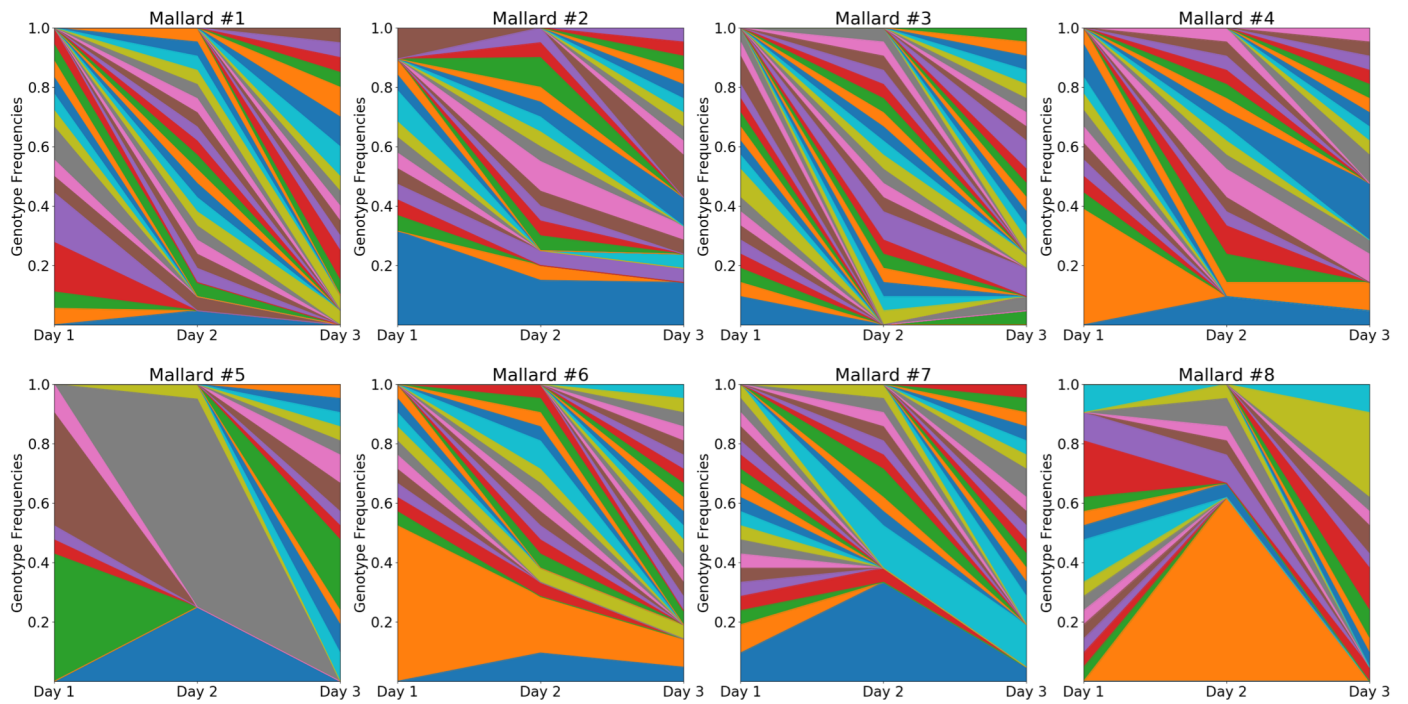

## B

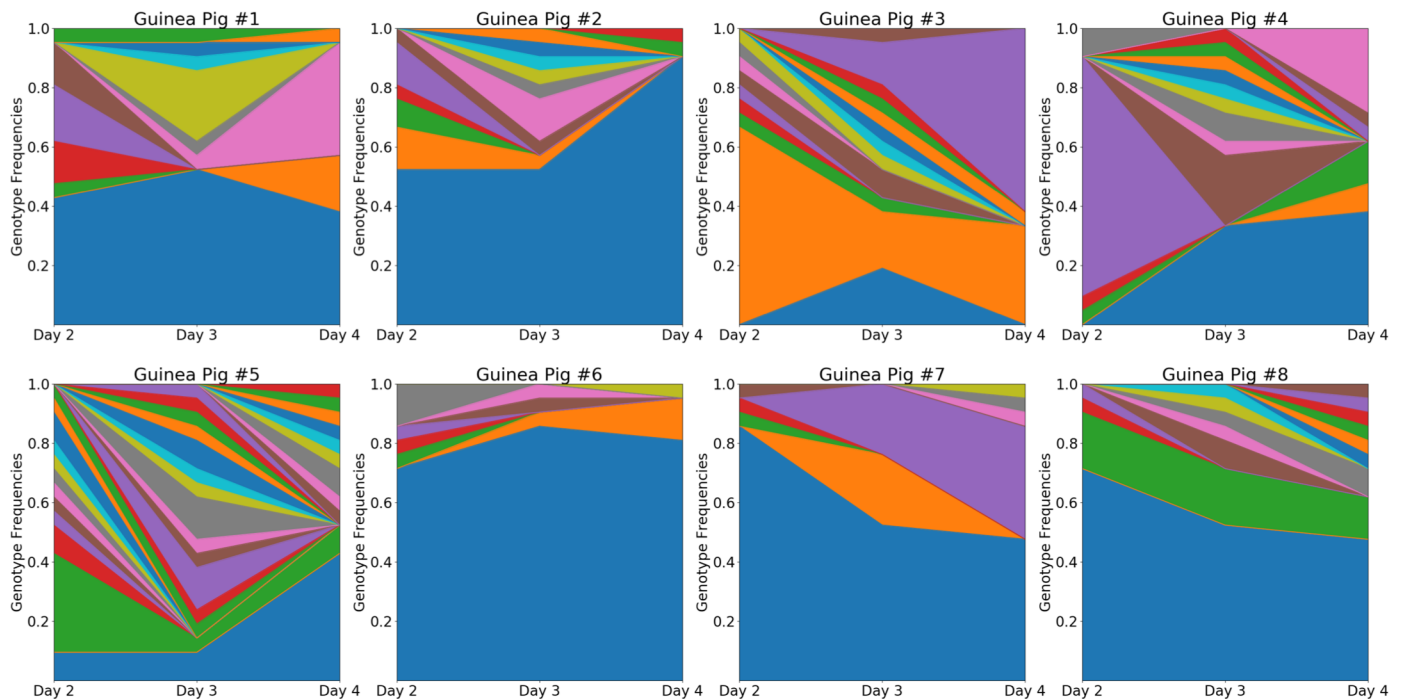

Supplement: viruses-13-00509-s001.pdf [file viruses-13-00509-s001.pdf]
